# Supplementary material for: Electroanalytical performance of a β-cyclodextrin and ionic liquid modified carbon paste electrode for the determination of verapamil in urine and pharmaceutical formulation
Source: Royal Society of Chemistry journal article supplement (doi:10.1039/d1ay00358e), 2021-01-01
Supplement: d1ay00358e1.pdf [file d1ay00358e1.pdf]

**Supplementary material – *Analytical Methods***

**Electroanalytical performance of a  $\beta$ -cyclodextrin and ionic liquid modified carbon paste electrode for the determination of verapamil in urine and pharmaceutical formulation**

Sanja Mutić<sup>a</sup>, Danka Radanović<sup>a</sup>, Milan Vraneš<sup>a</sup>, Slobodan Gadžurić<sup>a</sup> and Jasmina Anojčić<sup>a,\*</sup>

<sup>a</sup> University of Novi Sad, Faculty of Sciences, Department of Chemistry, Biochemistry and Environmental Protection, Trg Dositeja Obradovića 3, 21000 Novi Sad, Serbia.

**Corresponding author:**

\*e-mail: [jasmina.anojcic@dh.uns.ac.rs](mailto:jasmina.anojcic@dh.uns.ac.rs)

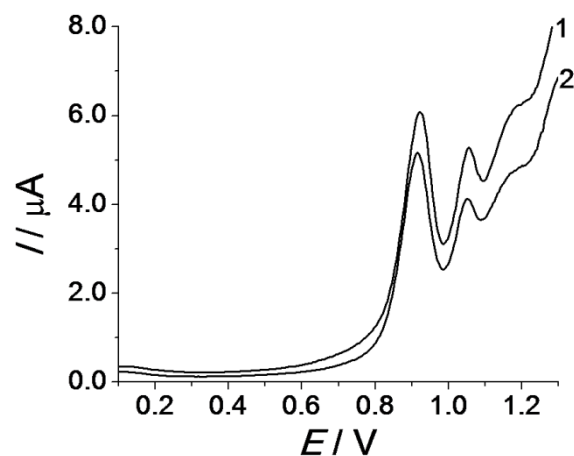

**Fig. S1** SW voltammograms of  $8.42 \mu\text{g mL}^{-1}$  VER at  $pH$  5.0 using [EMIM][NTf<sub>2</sub>]-CPE without heating (1) and after heating (2) of electrode material. Amount of electrode modifier: 4.3 wt%.

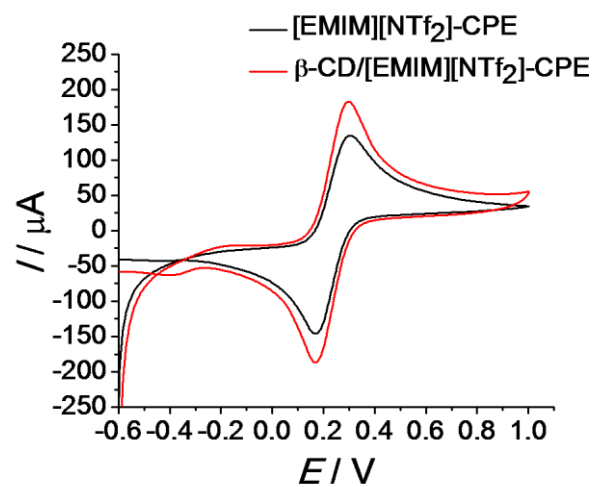

**Fig. S2** Cyclic voltammogram of  $0.01 \text{ mol L}^{-1}$  [Fe(CN)<sub>6</sub>]<sup>3-/4-</sup> solution containing  $0.5 \text{ mol L}^{-1}$  Na<sub>2</sub>SO<sub>4</sub> at [EMIM][NTf<sub>2</sub>]-CPE and β-CD/[EMIM][NTf<sub>2</sub>]-CPE. Scan rate: 100 mV/s.

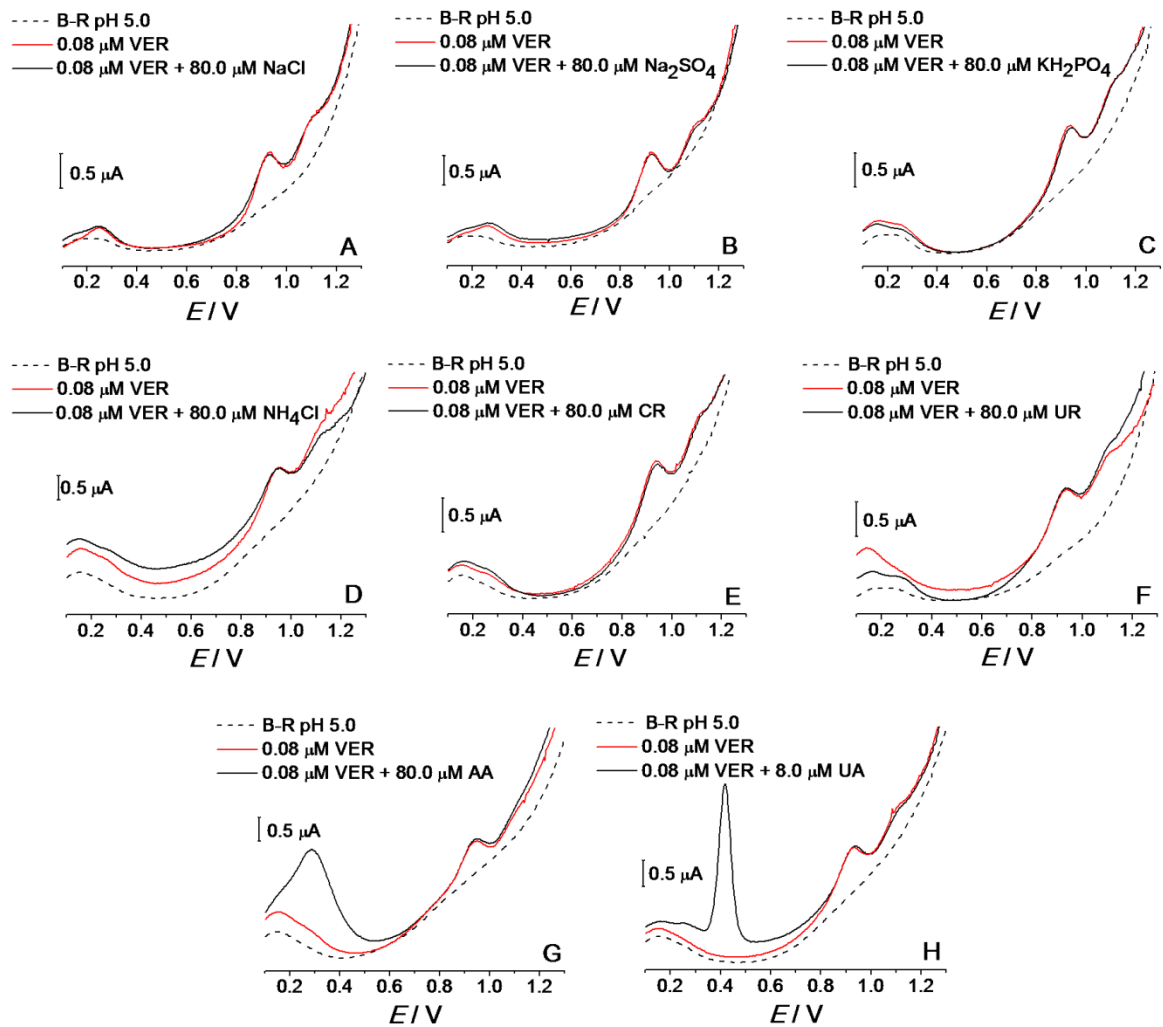

**Fig. S3** Interference study: SW-AdSVs of VER recorded in B-R buffer *pH* 5.0 at  $\beta$ -CD/[EMIM][NTf<sub>2</sub>]-CPE in the absence and presence of NaCl (A), Na<sub>2</sub>SO<sub>4</sub> (B), KH<sub>2</sub>PO<sub>4</sub> (C), NH<sub>4</sub>Cl (D), creatinine – CR (E), urea – UR (F), ascorbic acid – AA (G), uric acid – UA (H).

**Table S1** The influence of some possible interfering substances on the determination of 0.08  $\mu\text{mol L}^{-1}$  VER in B-R buffer *pH* 5.0 at  $\beta$ -CD/[EMIM][NTf<sub>2</sub>]-CPE

| Interferences                 | Interference/VER<br>molar ratio | Effect on VER peak intensity (%) |
|-------------------------------|---------------------------------|----------------------------------|
| Na <sup>+</sup>               | 1000                            | <0.2                             |
| K <sup>+</sup>                | 1000                            | <0.9                             |
| NH <sub>4</sub> <sup>+</sup>  | 1000                            | <0.2                             |
| SO <sub>4</sub> <sup>2-</sup> | 1000                            | <2.8                             |
| PO <sub>4</sub> <sup>3-</sup> | 1000                            | <0.9                             |
| Cl <sup>-</sup>               | 1000                            | <0.2                             |
| CR                            | 1000                            | <0.4                             |
| UR                            | 1000                            | <0.9                             |
| AA                            | 1000                            | <1.2                             |
| UA                            | 100                             | <1.6                             |
